# Supplementary material
Source: MDPI journal article supplement (https://www.mdpi.com/2297-8739/10/9/466)

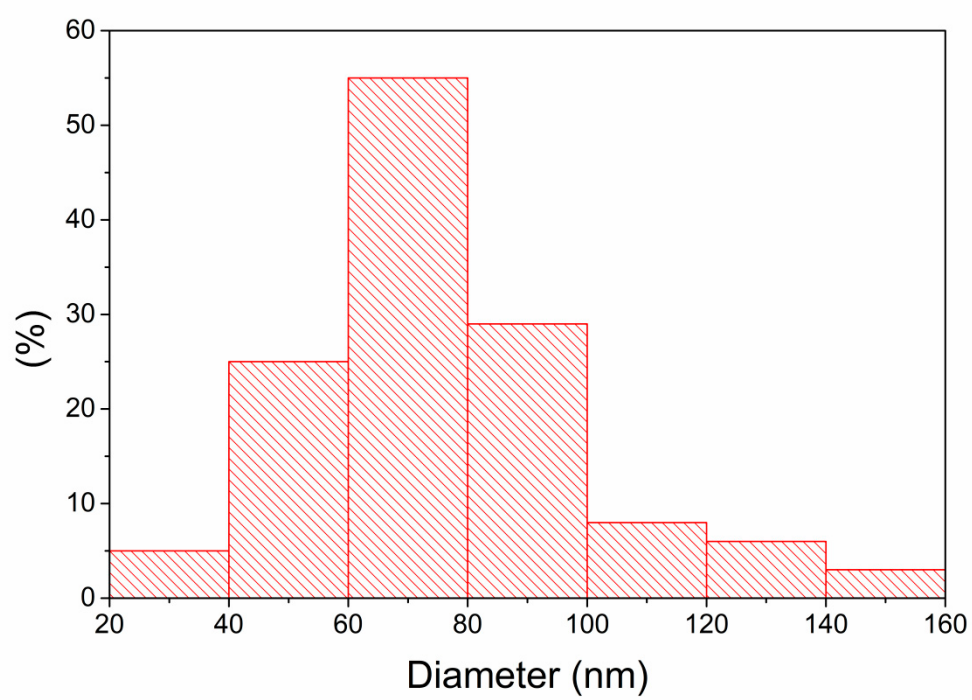

Figure S1. The size distribution of ZnO nanoparticles.

Supplement: s1 [file s1 › separations-2552111-supplementary.pdf]
